# Supplementary material for: The Promoter Region of the Proto-Oncogene MST1R Contains the Main Features of G-Quadruplexes Formation
Source: MDPI journal article supplement (doi:10.3390/ijms232112905), 2022-10-26
Supplement: s1 [file s1]

# The promoter region of the proto-oncogene MST1R contains the main features of G-quadruplexes formation

Coralie Robert<sup>1,2, †</sup>, Julien Marquevielle<sup>1,2, †</sup> and Gilmar F. Salgado<sup>1,2,\*</sup>

- 1 ARNA laboratory, Inserm U1212, CNRS UMR 5320, University of Bordeaux, 146 Rue Léo Saigat, F-33000 Bordeaux, France.
- 2 Institut Européen de Chimie et Biologie, UAR 3033 US001, CNRS, University of Bordeaux, 2 Rue Robert Escarpit, F-33600 Pessac, France.
- \* Correspondence: gilmar.salgado@u-bordeaux.fr
- † These authors contributed equally to this work

## Supplementary information

### Reverse strand

5' TAAGTGCAAAGTAGTTCCACCGCAAGCAAAGAGCCCAGTGTCTGCCCCCTTCTCGCTG  
CGAACCAGTCGGTAGTGGGGGGATGGGATGGGACGGCTCAGACTGGCTCACCTCTCTCCA  
GGCCACACCATGCACATCCACCCACAGGCCGCTGAGAAAAAGGCGCCAAGACGCCAGGTG  
AAGGTACAGGAGCCAGGCCTCCAAGGGCCGGAAGAGTCGGATGGGCGGAGGGCCTGGGCT  
AGGCCAAGCCTTCTCGCGGCCCGCCCCACGGCCCGACTCCGCCCGCCAGCCCCGGCG  
CCCTCGGGTCGGCTGAGCGCTAAGCGCCAGTGTACAGCGGCGGCTGGGCGGCGAGGTGAG  
GCGGCTGGGGCGTTGCTGTCTGCTCCGACGGCGTCAGGTGCTCAGACCCGAGGGCCGG  
GAAGGGATTGGGTTCACAGGAACCTGGGGCGGGGGTCCGCTATCTTGGGGCTGTCTGGG  
ACCGCTGCTTAAATTTGGCCAGTCCAGACCTCGAGTCGGGGCCCCAGCCAGGCCCCACGC  
CCAGGTCCAGGCCAGGCCGGTAGGGATCCTCTAGGGTCCAGCTCGCCTCGATGGAGCT  
CC 3'

R1 R2 R3 R4 R5

### Forward strand

5' GGAGCTCCATCGAGGCGAGCTGGGACCCTAGAGGATCCCTACCGGCCTGGGCCTGGACCT  
GGGCGTGGGCCTGGCTGGGGGCGGACTCGAGGTCTGGACTGGGCCAAATTTAAGCAGCG  
GTCCCGACAGCCCCAAGATAGCGGACCCCCGCCCCAGGTTCTGTGAAACCCAAATCCCT  
TCCCGGCCCTCGGGTCTGAGCACCTGACGCCTGCGGACGCACGACAGCAACGCCCCAGCC  
GCCTCACCTGCCGCCCCAGCCGCCGCTGTACACTGGCGCTTAGCGCTCAGCCGACCCGAG  
GGCGCCGGGCTGGGCGGGCGGAGTCGGGCGCGGGGCGCGAGGAAGGCCTGGC  
CTAGCCCAGGCCCTCCGCCATCCGACTCTTCCGGCCCTTGGAGGCCTGGCTCCTGTACC  
TTCACCTGGCGTCTTGGCGCCTTTTCTCAGCGGCCTGTGGGTGGATGTGCATGGTGTGG  
CCTGGAGAGAGGTGAGCCAGTCTGAGCCGTCCCATCCCATCCCCCACTACCGACTGGTT  
CGCAGCGAGAAGGGGGGAGGACACTGGGCCTTTTGGCTTGGCGGTGGAAGTGTGCACT  
TA 3'

F1 F2 F3 F4 F5

Figure S1. MST1R promoter region with G4 hunter software highest score sequences highlighted in color.

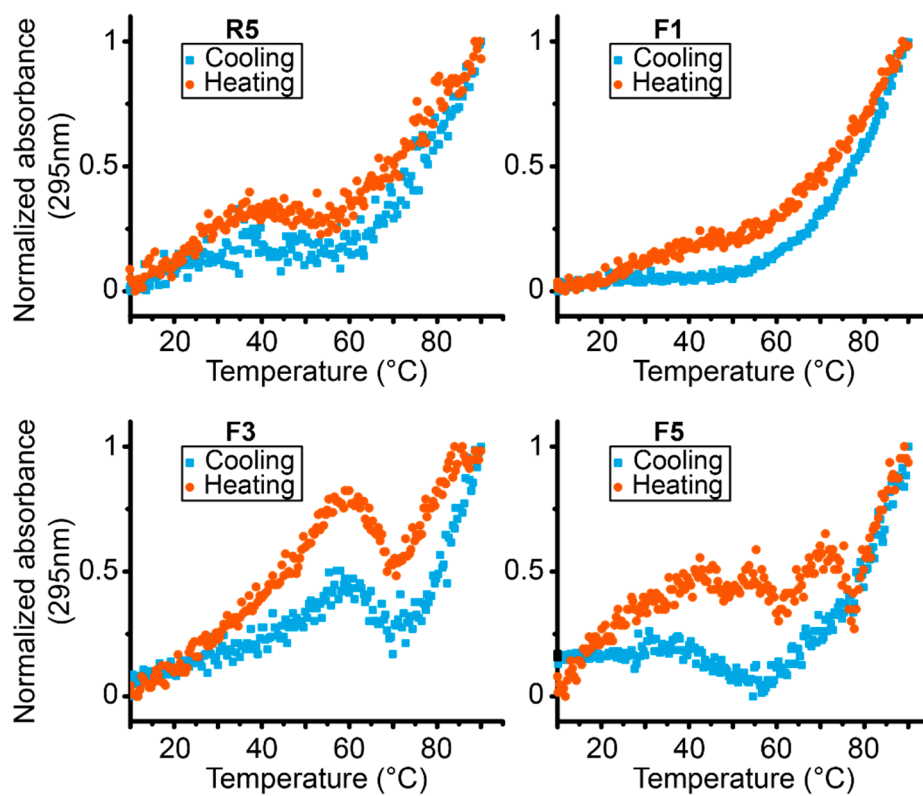

**Figure S2.** UV-melting spectra of reverse and forward MST1R G-quadruplexes non-forming sequences at 295 nm from 10°C to 90°C. All experiments were performed in buffer 1X (50 mM KCl; 10 mM KPi; pH 6.66).

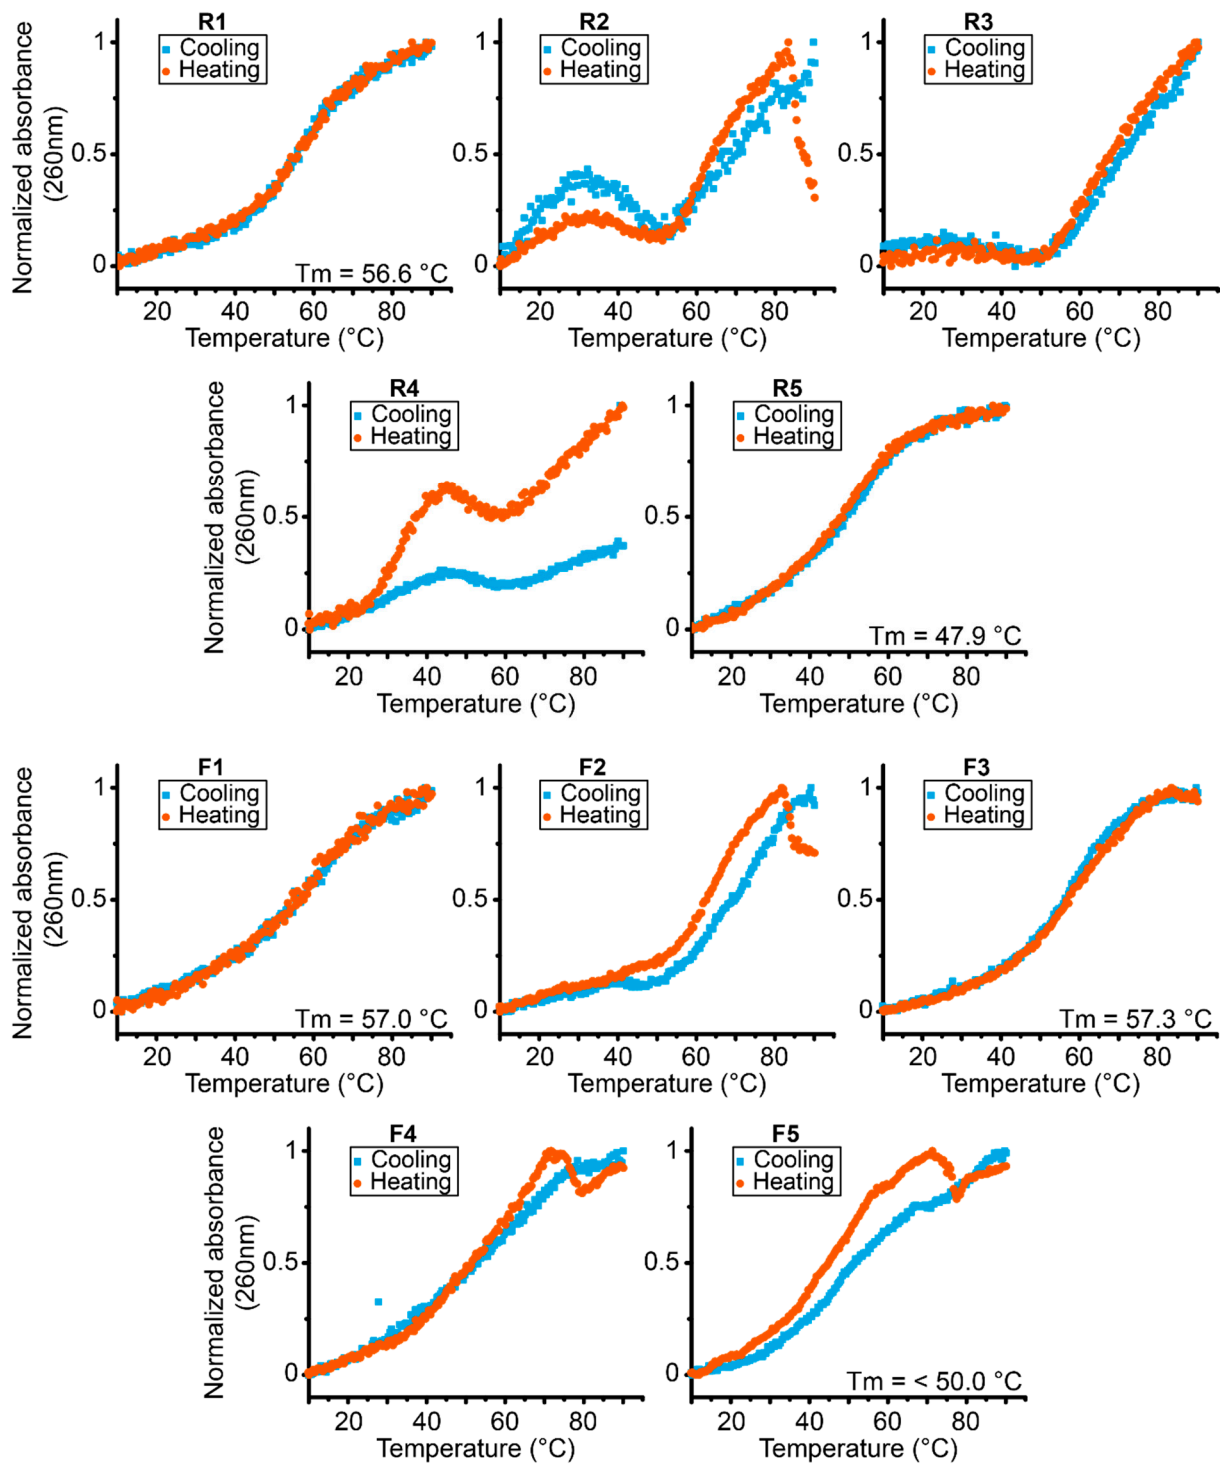

**Figure S3.** UV-melting spectra of reverse and forward MST1R sequences at 260 nm from 10°C to 90°C. All experiments were performed in buffer 1X (50 mM KCl; 10 mM KPi; pH 6.66).
